# Supplementary material for: Bacteroides intestinalis DSM 17393, a member of the human colonic microbiome, upregulates multiple endoxylanases during growth on xylan
Source: PubMed Central journal article supplement (PMC5041131; doi:10.1038/srep34360), 2016-09-29
Supplement: srep34360-s1.pdf [file srep34360-s1.pdf]

1 **Supplemental materials**

2

3 ***Bacteroides intestinalis* DSM 17393, a member of the human colonic**

4 **microbiome, upregulates multiple endoxylanases during growth on xylan**

5

6 Kui Wang<sup>1,2</sup>, Gabriel V. Pereira<sup>1,2,3</sup>, Janaina J. V. Cavalcante<sup>1,2</sup>, Meiling Zhang<sup>1,2,3</sup>,

7 Roderick Mackie<sup>1,2,3</sup> and Isaac Cann<sup>1,2,3,4,\*</sup>

8

9 Energy Biosciences Institute<sup>1</sup>, Carl R. Woese Institute for Genomic Biology<sup>2</sup>, Department of

10 Animal Science<sup>3</sup>, Department of Microbiology<sup>4</sup>, University of Illinois at Urbana-Champaign,

11 Urbana, IL 61801, USA

13

14 **Supplemental Table 1.** Primer sequences used in this study.

| Gene name       | Direction | Nucleotide sequence (5'→3')a                    |
|-----------------|-----------|-------------------------------------------------|
| BiXyn10C        | Forward   | GACGACGACAAGTGCGAGGATAATAAGATGGAATGGGGTAC       |
|                 | Reverse   | GAGGAGAAGCCCGGTTATTGATCAGCGGGAGTTTCTTCCTC       |
| BiXyn10B/Ara43A | Forward   | GACGACGACAAGGCAGACCCGACTCTAAAAGATATTCTC         |
|                 | Reverse   | GAGGAGAAGCCCGGTTAATTCGTATAGTTTCCTGTGGCAT        |
| BiXyn8A         | Forward   | GACGACGACAAGCATCCTGTTTCAGGAAGACAGTAGTGGG        |
|                 | Reverse   | GAGGAGAAGCCCGGCTACTTGATAATCCGGAAATTGCC          |
| BiXyn5A         | Forward   | GACGACGACAAGGACGAGACTATTCCTGAGCAGCCG            |
|                 | Reverse   | GAGGAGAAGCCCGGTTAATTTGCTAAGGAGACATTAGCTAT       |
| BiXyn10A        | Forward   | GACGACGACAAGGTGGACGACAAACCGTTGGCATTCTGAAG       |
|                 | Reverse   | GAGGAGAAGCCCGGTTATTTTCCAGCCAATCCATCAGCAAAAC     |
| BiXyl43A        | Forward   | GACGACGACAAGATGAAGAAAGAAAAAGATACTTGGTACCCGGAGAT |
|                 | Reverse   | GAGGAGAAGCCCGGTTAATCCAGTCCTTCAATGGTGACGATCT     |
| BiAgu67A        | Forward   | GACGACGACAAG GAAGACGGCAGCCGCTTG                 |
|                 | Reverse   | GAGGAGAAGCCCGGTTATCTTCTTTCATTTCAGCATTTTG        |

15 a Sequences underlined denote the incorporated T4 exonuclease digestion sites from pET-46b Ek-LIC  
16 vector.

17

18

19

20

21

22

23

24

25

26

27

28

29 **Fig. S1** Biochemical characterization of xylan utilization loci. Enzymatic activity reported relative to  
30 optimal pH (A) and temperature (B) conditions. Error bars represent standard deviation for three replicates

A

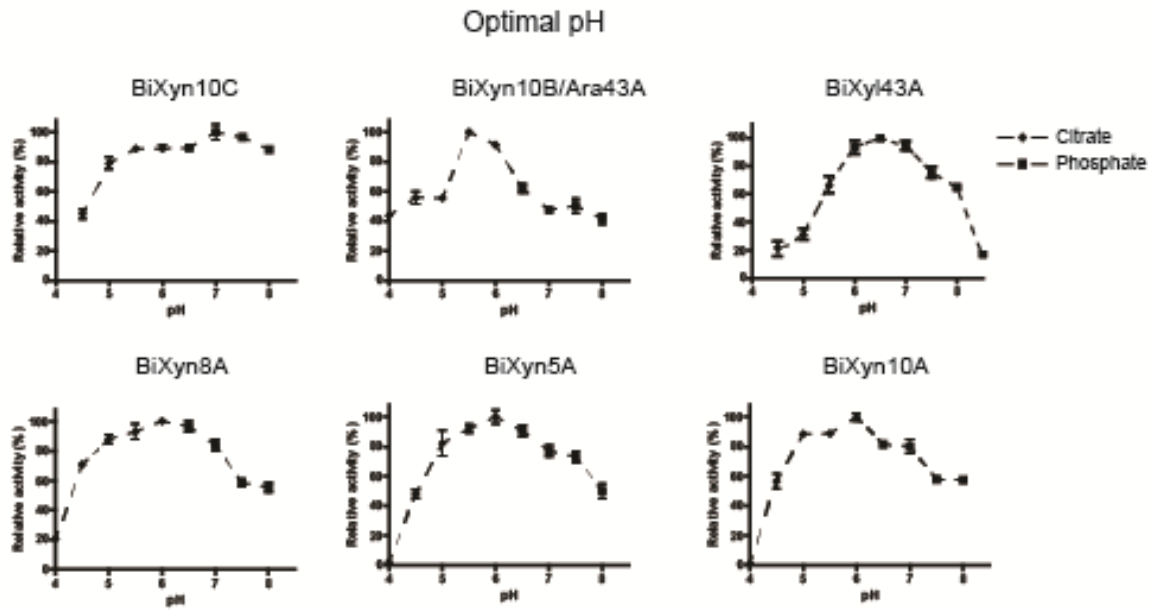

B

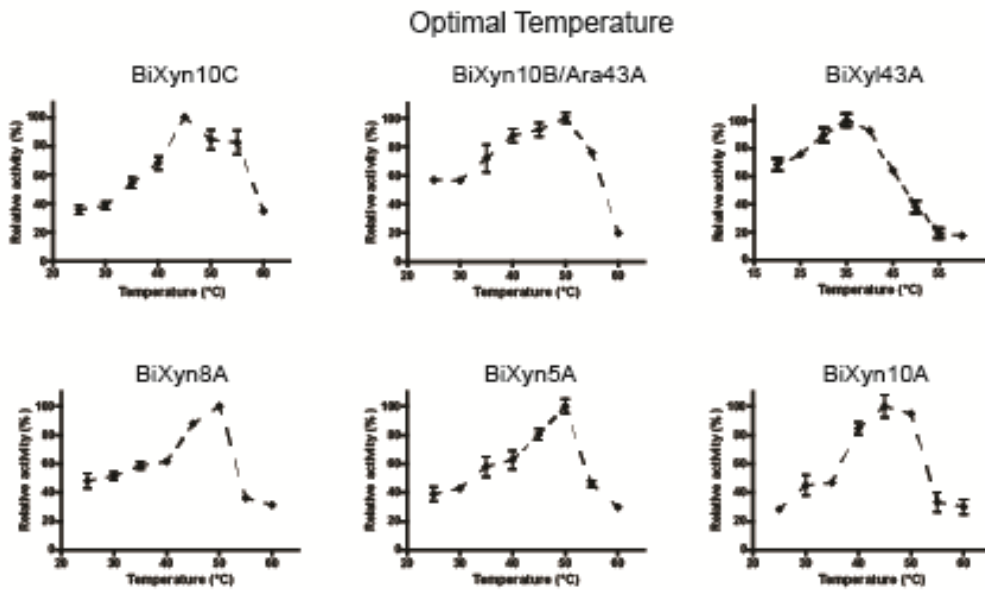

31

32

33

34

35

36

37 **Fig. S2** 30-min hydrolysis of xylan substrates. The final concentration for each enzyme was 0.5  $\mu$ M, the  
 38 final hydrolysis products were identified and quantified by HPLC, Arabinose (A1), xylose (X1) and xylo-  
 39 oligosaccharides (X2 to X6) were mixed and analyzed by HPLC to serve as standards for the assignment  
 40 of the released products. Calibration curves were constructed with known concentrations of A1 and X1-  
 41 X6. The concentrations of each sugar were calculated by fitting the peak area into calibration curve.

42 (A) 30-min hydrolysis of xylan substrates (WAX, RAX and OSX) by the five putative endoxylanases.

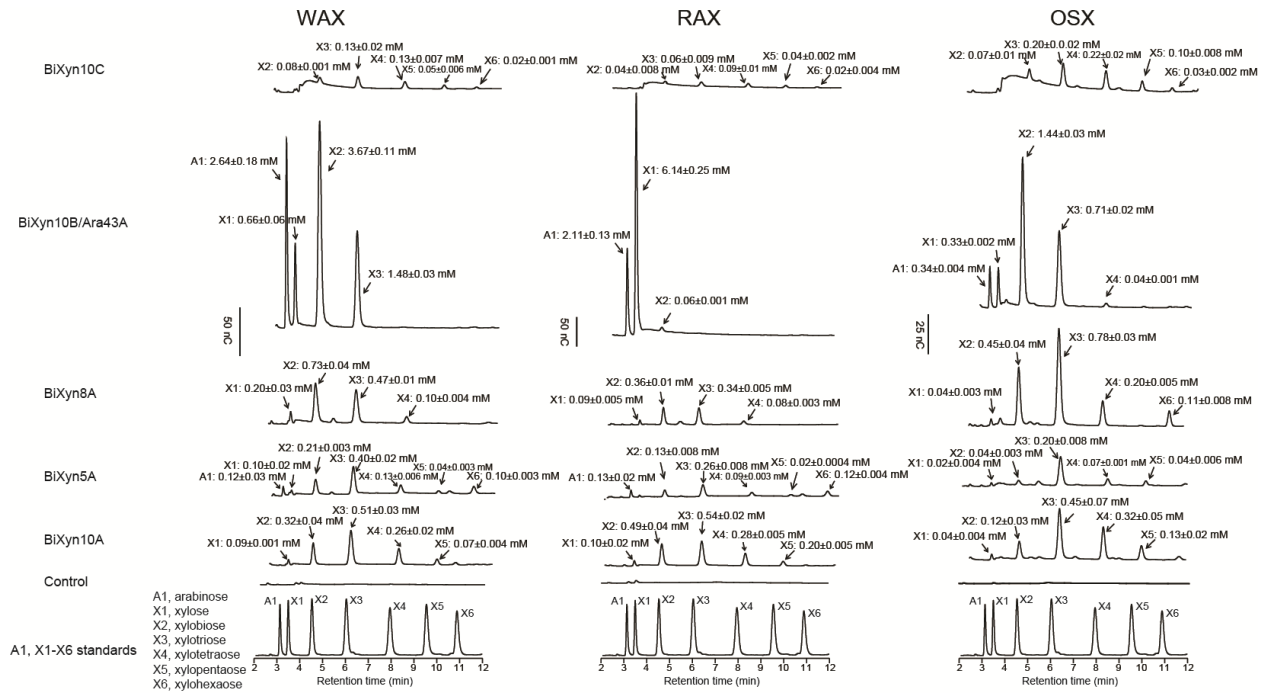

43  
 44  
 45  
 46  
 47  
 48  
 49  
 50  
 51

52 **Fig. S2 (B)** 30-min synergistic hydrolysis of xylan substrates of multiple endoxylanases with BiXyl43A and BiAgu67A towards WAX, RAX and OSX.  
 53

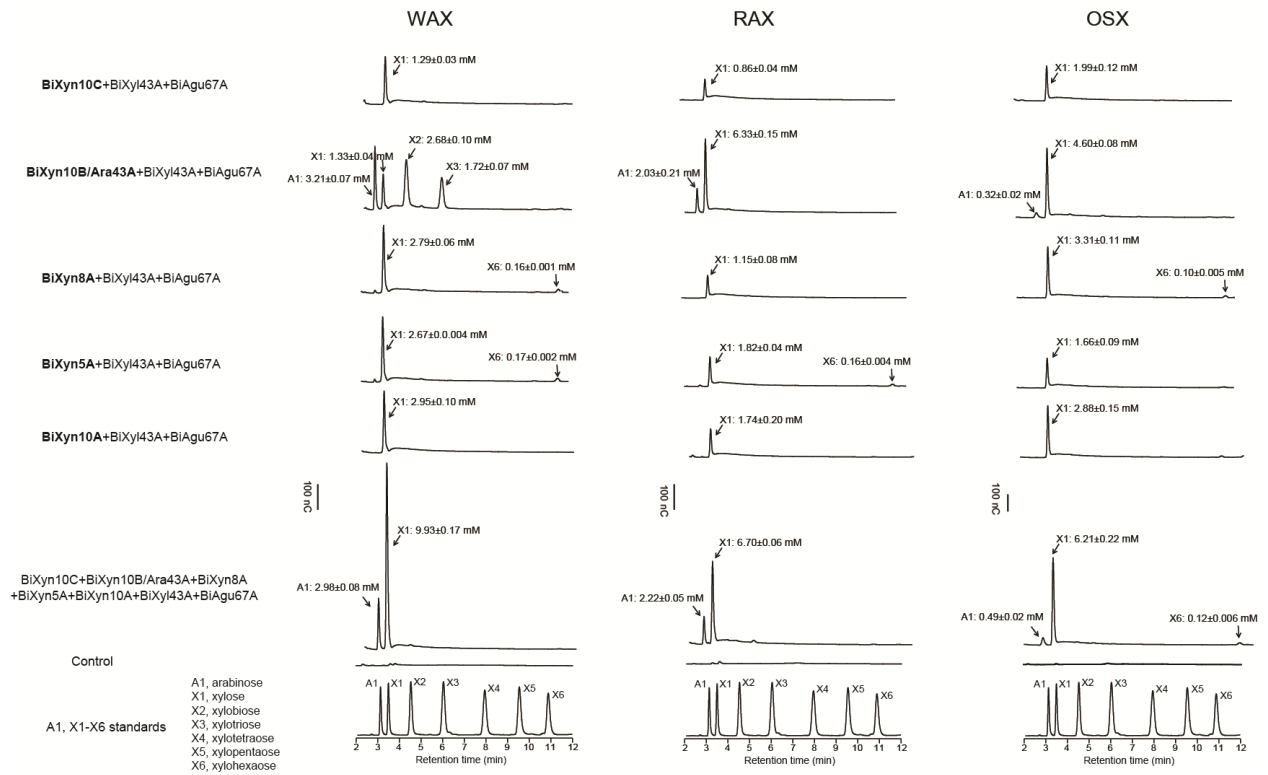

54
